# Supplementary material for: Depressive symptoms among people with HIV/AIDS in Northwest Ethiopia: comparative study
Source: PubMed Central journal article supplement — BMJ Open. 2021 Jul 1;11(7):e048931. doi: 10.1136/bmjopen-2021-048931 (PMC8252867; doi:10.1136/bmjopen-2021-048931), 2021-07-01
Supplement: bmjopen-2021-048931.draft_revisions.pdf [file bmjopen-2021-048931.draft_revisions.pdf]

# BMJ Open

BMJ Open is committed to open peer review. As part of this commitment we make the peer review history of every article we publish publicly available.

When an article is published we post the peer reviewers' comments and the authors' responses online. We also post the versions of the paper that were used during peer review. These are the versions that the peer review comments apply to.

The versions of the paper that follow are the versions that were submitted during the peer review process. They are not the versions of record or the final published versions. They should not be cited or distributed as the published version of this manuscript.

BMJ Open is an open access journal and the full, final, typeset and author-corrected version of record of the manuscript is available on our site with no access controls, subscription charges or pay-per-view fees (<http://bmjopen.bmj.com>).

If you have any questions on BMJ Open's open peer review process please email [info.bmjopen@bmj.com](mailto:info.bmjopen@bmj.com)

# BMJ Open

## Depression among people with HIV/AIDS in Northwest Ethiopia: A comparative cross-sectional study

|                               |                                                                                                                                                                                                                                                       |
|-------------------------------|-------------------------------------------------------------------------------------------------------------------------------------------------------------------------------------------------------------------------------------------------------|
| Journal:                      | <i>BMJ Open</i>                                                                                                                                                                                                                                       |
| Manuscript ID                 | bmjopen-2021-048931                                                                                                                                                                                                                                   |
| Article Type:                 | Original research                                                                                                                                                                                                                                     |
| Date Submitted by the Author: | 12-Jan-2021                                                                                                                                                                                                                                           |
| Complete List of Authors:     | Mekonen , Tesfa; Bahir Dar University, Department of Psychiatry<br>Belete, Habte; Bahir Dar University, Department of Psychiatry<br>Fekadu, Wubalem; Bahir Dar University, Department of Psychiatry; Addis Ababa University, Department of Psychiatry |
| Keywords:                     | Depression & mood disorders < PSYCHIATRY, HIV & AIDS < INFECTIOUS DISEASES, MENTAL HEALTH                                                                                                                                                             |
|                               |                                                                                                                                                                                                                                                       |

SCHOLARONE™  
Manuscripts

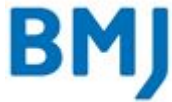

I, the Submitting Author has the right to grant and does grant on behalf of all authors of the Work (as defined in the below author licence), an exclusive licence and/or a non-exclusive licence for contributions from authors who are: i) UK Crown employees; ii) where BMJ has agreed a CC-BY licence shall apply, and/or iii) in accordance with the terms applicable for US Federal Government officers or employees acting as part of their official duties; on a worldwide, perpetual, irrevocable, royalty-free basis to BMJ Publishing Group Ltd ("BMJ") its licensees and where the relevant Journal is co-owned by BMJ to the co-owners of the Journal, to publish the Work in this journal and any other BMJ products and to exploit all rights, as set out in our [licence](#).

The Submitting Author accepts and understands that any supply made under these terms is made by BMJ to the Submitting Author unless you are acting as an employee on behalf of your employer or a postgraduate student of an affiliated institution which is paying any applicable article publishing charge ("APC") for Open Access articles. Where the Submitting Author wishes to make the Work available on an Open Access basis (and intends to pay the relevant APC), the terms of reuse of such Open Access shall be governed by a Creative Commons licence – details of these licences and which [Creative Commons](#) licence will apply to this Work are set out in our licence referred to above.

Other than as permitted in any relevant BMJ Author's Self Archiving Policies, I confirm this Work has not been accepted for publication elsewhere, is not being considered for publication elsewhere and does not duplicate material already published. I confirm all authors consent to publication of this Work and authorise the granting of this licence.

1  
2  
3 **Depression among people with HIV/AIDS in Northwest Ethiopia: A**  
4  
5  
6 **comparative cross-sectional study**  
7  
8

9 Tesfa Mekonen<sup>1,\*</sup>, Habte Belete<sup>1</sup>, Wubalem Fekadu<sup>1,2</sup>  
10  
11

12 <sup>1</sup>Department of Psychiatry, College of Medicine and Health Sciences, Bahir Dar University, Bahir Dar, Ethiopia  
13

14 <sup>2</sup>Department of Psychiatry, College of Health Sciences, Addis Ababa University, Addis Ababa, Ethiopia  
15  
16

17  
18 \*Correspondence  
19

20 Tesfa Mekonen: [smarthope1@gmail.com](mailto:smarthope1@gmail.com)  
21  
22

23  
24 Word count: 2,325  
25  
26  
27  
28  
29  
30  
31  
32  
33  
34  
35  
36  
37  
38  
39  
40  
41  
42  
43  
44  
45  
46  
47  
48  
49  
50  
51  
52  
53  
54  
55  
56  
57  
58  
59  
60

## Abstract

**Objectives:** The objective of this study was to compare depression among people with HIV/AIDS and the general population sample. We also assessed the factors associated with depression in both HIV/AIDS and the general population sample.

**Design:** A comparative cross-sectional study was conducted.

**Settings:** Antiretroviral therapy clinics in three primary healthcare facilities and semi-urban area in Northwest Ethiopia.

**Participants:** A total of 1115 participants (558 for HIV-positive sample and 557 for general population comparison group) aged 18 years and above were recruited. From the total sample size, 1,026 participants (530 from the HIV-positive sample and 496 from the general population comparison group) completed the interview. Individuals with known HIV-positive status were excluded from the general population comparison group.

**Outcome measure:** Patient Health Questionnaire (PHQ-9) was used to assess depression. The proportion of depression was compared between samples of the general population and people living with HIV/AIDS using chi-squared statistics. Multivariable logistic regression analysis was done to examine the associated factors.

**Results:** The overall proportion of depression was 13.3% (11.2 – 15.4%). The proportion was significantly higher in people living with HIV/AIDS, 16.6% (13.4 – 19.8%) compared to the community sample, 9.7% (7.1 – 12.3%),  $p = 0.001$ . The difference was significant in the multivariable logistic regression where the odds of depression in people with HIV/AIDS was 1.7 times more than the community sample. Variables significantly associated with depression for the overall sample were older age, being single, divorced/widowed, and poor social support.

**Conclusions:** Depression was higher in people with HIV/AIDS compared to the general population. It is necessary to include mental healthcare and screening for depression in routine HIV/AIDS care.

**Keywords:** Depression, HIV/AIDS, Comparative study; Co-morbidity; Ethiopia

### Strengths and limitations of this study

- This study provides evidence comparing depression among people with HIV/AIDS and the general population.
- Matching of variables between the study and comparison group was not employed.
- We were not able to exclude those who are HIV positive but who did not know their status in the comparison group.
- Due to the cross-sectional nature of the study, we cannot report causal relationships.

## 1. Introduction

HIV/AIDS continues to be a global public health threat with more than 75 million infections and 32 million AIDS-related deaths since the start of the epidemic.<sup>1 2</sup> On the other hand, depression is also a major public health issue and has been considered as a global crisis because of its high contribution to the disease burden, high comorbidities with other medical conditions, and associated disabilities.<sup>3 4</sup> The comorbidity of depression and HIV/AIDS is common that ranged between 12% - 63%.<sup>5-7</sup> This was more pronounced in low resource settings, particularly in Sub-Saharan Africa.<sup>8 9</sup> A global systematic review and meta-analysis also reported 31% of depression in people with HIV/AIDS.<sup>10</sup> The prevalence of depression in people with HIV/AIDS has been reported as at least twice that of the general population.<sup>5 11</sup> This comorbidity between depression and HIV/AIDS have significant consequences in reducing in antiretroviral therapy (ART) responses, interfering in daily life, and leading to poor quality of life.<sup>12-14</sup>

The magnitude of depression among HIV/AIDS patients is disproportionately high and its effect is mostly associated with poor disease progress and poor quality of life. This comorbidity is

1  
2  
3 associated with multiple factors including sociodemographic, psychosocial, and clinical factors.<sup>15-</sup>

4  
5 <sup>18</sup> For instance, people living with HIV who received ART without HIV counseling and testing  
6  
7 services are more likely to develop depression.<sup>19</sup> Female gender and recent negative life events are  
8  
9 also known contributors to depression in HIV/AIDS patients.<sup>20</sup> However, depression remains  
10  
11 underdiagnosed in people with HIV/AIDS.<sup>21</sup>  
12  
13  
14

15  
16 Depression can be prevented and treated with available resources at the primary care level if  
17  
18 detected early and the important factors are identified. To prevent and manage depression in  
19  
20 HIV/AIDS, the most important contributing factors need to be explored. Despite the high  
21  
22 prevalence and negative consequences of depression among HIV-positive individuals, there is  
23  
24 substandard care for depression in most low-income countries HIV care programs.<sup>22-24</sup>  
25  
26  
27

28 In Ethiopia, the prevalence of depression was reported 14.6 – 48.6% among people living with  
29  
30 HIV/AIDS<sup>25-27</sup> and 9.1% in the general population.<sup>16</sup> However, there was no study found that  
31  
32 compares depression in HIV-positive people. It is important to see if there is any significant  
33  
34 difference in prevalence and possible modifiable factors of depression between HIV-positive  
35  
36 people and the general population. Therefore, the objectives of this study were:  
37  
38  
39

- 40 1. To assess the level of depression among HIV-positive individuals in the ART clinic  
41 compared to the general population.
- 42 2. To identify factors associated with depression in HIV-positive people and the general  
43 population.  
44  
45  
46  
47  
48  
49  
50  
51  
52  
53  
54  
55  
56  
57  
58  
59  
60

## 2. Methods and materials

### 2.1. Study design and setting

A comparative cross-sectional study was conducted in Mecha Demographic Surveillance and Field Research Center (MDSFRC). The site is in Mecha district, Northwest Ethiopia which is 540 kilometers away from Addis Ababa. MDSFRC is one of the newly established research centers in Bahir Dar University. We recruited people with HIV/AIDS from the adult ART clinics in the district and the comparisons from the general population.

### 2.2. Participants

HIV-positive individuals aged 18 years and above (69.8% Female) in the adult ART clinics of the district were included in the study group. For the general population comparison group, adult residents of Merawi town (a town in Mecha district) aged 18 years and above (48.4% Female) who resided for at least six months were included. In the comparison group, individuals with known HIV-positive status were excluded.

### 2.3. Data collection and procedures

Data collection was through face-to-face interviews by trained data collectors in March 2018. Clinical data were retrieved from the participants' medical records. Participants were assured of confidentiality and the anonymity of the questionnaire was maintained. Supervisors and data collectors counterchecked the questionnaire every day for its completeness. Sample size was calculated using Epi-Info by considering 80% power, 95% confidence interval, 9.1% depression in the general population,<sup>16</sup> 14.9% depression in HIV positive people,<sup>28</sup> 10% non-response rate, and 1:1 ratio of the study and comparative groups to detect 1.7 odds of depression in the study



1  
2  
3 group. The final sample size was 1115 (558 for HIV positive sample and 557 general population  
4 comparison group).  
5  
6

7  
8 In the community comparison group, we selected administrative villages from Merawi town by  
9 multi-stage sampling method. We randomly selected the households from the administrative  
10 villages using the registration of MDSFRC. We selected one participant using lottery method for  
11 those households with more than one eligible participant. For the study group, around 1200  
12 individuals were estimated to attend their ART follow up during the data collection period. We  
13 used a systematic random sampling method to select participants in every two individuals based  
14 on their appointment from the ART clinic registration logbook.  
15  
16  
17  
18  
19  
20  
21  
22  
23  
24

## 25 2.4. Variables and Measurements

26 We measured depression by Patient Health Questionnaire-9 (PHQ-9). PHQ-9 is a tool with nine  
27 items and validated in the Ethiopian population with good psychometric properties (86%  
28 sensitivity and 67% specificity with 10 cut-off point)<sup>29</sup>. Severity of depressive symptoms were  
29 also described based on PHQ-9 score (0 – 4 = no depressive symptoms, 5 – 9 = mild depressive  
30 symptoms, 10 – 14 = moderate depressive symptoms, 15 – 19 = moderately severe symptoms, and  
31 20+ = severe depressive symptoms).<sup>30</sup> The tool also had good reliability in the current study  
32 (Cronbach's Alpha = 0.79).  
33  
34  
35  
36  
37  
38  
39  
40  
41  
42  
43  
44

45 The independent variables were:

46 Socio-demographic variables: sex, age, marital status, educational status, perceived relative  
47 income  
48

49 Psychosocial variables: social support, alcohol abuse, and khat chewing  
50

51 HIV related variables: CD4 level, duration of HIV-positive status and ART use, ART regimen,  
52 and presence of opportunistic infections  
53  
54  
55  
56  
57  
58  
59  
60

1  
2  
3 Social support was assessed using Oslo Social Support Scale (OSSS-3), three items scale, has a  
4 sum score ranges from 3 – 14 (poor social support = 3 – 8, intermediate social support = 9 – 11,  
5 and strong social support = 12 – 14).<sup>31</sup> Perceived general quality of life was assessed by asking the  
6 participants to rate their quality of life, adapted from the World Health Organization's quality of  
7 life assessment tool.<sup>32</sup> Relative wealth of the participants was assessed by asking them what they  
8 perceived about their wealth in relation to others in their neighborhood.<sup>33</sup> Problematic alcohol use  
9 was assessed by Alcohol Use Disorder Identification Test-Consumption (AUDIT – C) which is a  
10 3-items scale with 72% specificity and 86% sensitivity for men, and 94% specificity and 66%  
11 sensitivity for women.<sup>34 35</sup>

## 24 2.5. Analysis

25  
26 Data entry was done with Epi info version 7(double entry) and analysis was done with SPSS-21.  
27 Chi-squared test was used to compare simple frequencies in between groups. We run univariate  
28 logistic regression for each variable to select variables (p-value < 0.2) for the final model<sup>36</sup>.  
29 Multivariable logistic regression analysis was done to identify the associated variables. The  
30 strength of associations was indicated by OR (odds ratio) with a 95% confidence interval.  
31 Variables with p-values < 0.05 were considered as statistically significant.

## 42 2.6. Patient and public involvement

43  
44 The participants were not involved in the design, conduct, reporting, or dissemination plans of this  
45 research.

## 48 3. Results

### 50 3.1. Socio-demographic characteristics of the participants

51  
52 From the total of 1,115 participants, 1026(496 from the general population and 530 from the ART  
53 clinics) agreed to participate in the study. The reasons for non-response were lack of time to  
54  
55  
56  
57

complete the interview (n = 47), no interest to participate (n = 23), and withdraw the interview without giving reason (n = 19). The mean age of participants was 38.85 years (SD ± 10.72) and most of them were in the age group of 25 – 44 years. The overall divorce and widow rates were 22.9% and 7.6% respectively. This is significantly higher in the HIV positive sample (18.3% and 11.3%) as compared with the community sample (4.6% and 3.6%),  $p < 0.001$ . (Table 1)

Table 1: Socio-demographic characteristics of the respondents (N = 1026)

| Variables                        | Sample type            |           | Overall   | p-value( $\chi^2$ ) |         |
|----------------------------------|------------------------|-----------|-----------|---------------------|---------|
|                                  | Community n(%)         | HIV n(%)  | N(%)      |                     |         |
| Sex                              | Male                   | 256(51.6) | 160(30.2) | 416(40.5)           | < 0.001 |
|                                  | Female                 | 240(48.4) | 370(69.8) | 610(59.5)           |         |
| Age                              | < 25 years             | 109(22)   | 22(4.2)   | 131(12.8)           | < 0.001 |
|                                  | 25 – 44 years          | 305(61.5) | 382(72.1) | 687(67)             |         |
|                                  | Above 44 years         | 82(16.5)  | 126(23.8) | 208(20.3)           |         |
| Family size                      | One (alone)            | 100(20.2) | 124(23.4) | 224(21.8)           | 0.29    |
|                                  | Two to five            | 352(71)   | 369(69.6) | 721(70.3)           |         |
|                                  | More than five         | 44(8.9)   | 37(7)     | 81(7.9)             |         |
| Family income compared to others | Better                 | 20(4)     | 13(2.5)   | 33(3.2)             | < 0.001 |
|                                  | Average                | 257(51.8) | 138(26)   | 395(38.5)           |         |
|                                  | Poor                   | 219(44.2) | 379(71.5) | 598(58.3)           |         |
| Marital status                   | Married                | 276(55.6) | 235(44.3) | 511(49.8)           | < 0.001 |
|                                  | Single                 | 155(31.3) | 47(9.5)   | 202(19.7)           |         |
|                                  | Divorced               | 47(4.6)   | 188(18.3) | 235(22.9)           |         |
|                                  | Widowed                | 18(3.6)   | 60(11.3)  | 78(7.6)             |         |
| Education                        | Unable to read & write | 138(27.8) | 165(31.1) | 303(29.5)           | 0.2     |
|                                  | Informal education     | 61(12.3)  | 79(14.9)  | 140(13.6)           |         |
|                                  | Elementary school      | 99(20)    | 103(19.4) | 202(19.7)           |         |
|                                  | Secondary school       | 126(25.4) | 106(20)   | 232(22.6)           |         |
|                                  | College and above      | 72(15.5)  | 77(14.5)  | 149(14.5)           |         |

### 3.2. Psychosocial and related characteristics

Khat (*Catha edulis*, evergreen, psychoactive leaf which is commonly cultivated in East Africa) was chewed by 6% of participants (9.5% in the community sample and 2.8% in the HIV sample);  $p < 0.001$ . The HIV positive participants reported relatively good social support as compared to the community participants. (Table 2)

Table 2: Psychosocial factors of the participants (N = 1026)

| Variables               | Sample type          |           | Overall   | p-value( $\chi^2$ ) |         |
|-------------------------|----------------------|-----------|-----------|---------------------|---------|
|                         | Community n(%)       | HIV n(%)  | N(%)      |                     |         |
| Khat chewing            | Never                | 449(90.5) | 515(97.2) | 964(94)             | < 0.001 |
|                         | Yes                  | 47(9.5)   | 15(2.8)   | 62(6)               |         |
| Problematic alcohol use | No                   | 427(86.1) | 501(94.5) | 928(90.4)           | < 0.001 |
|                         | Yes                  | 69(13.9)  | 29(5.5)   | 98(9.6)             |         |
| Social support          | Poor support         | 259(52.2) | 215(40.6) | 474(46.2)           | < 0.001 |
|                         | Intermediate support | 201(40.5) | 246(46.4) | 447(43.6)           |         |
|                         | Strong support       | 36(7.3)   | 69(13)    | 105(10.2)           |         |
| Depressive symptoms     | None                 | 287(57.9) | 313(59.1) | 600(58.5)           | <0.001  |
|                         | Mild                 | 161(32.5) | 129(24.3) | 290(28.3)           |         |
|                         | Moderate             | 23(4.6)   | 62(11.7)  | 85(8.3)             |         |
|                         | Moderately severe    | 21(4.2)   | 24(4.5)   | 45(4.4)             |         |
|                         | Severe               | 4(0.8)    | 2(0.4)    | 6(0.6)              |         |

### 3.3. HIV and other related characteristics of HIV positive participants

The mean duration since HIV status determined was 79.9 months (SD  $\pm$  35.9 months) with a minimum of 2 months and a maximum of 159 months. The mean duration since ART started was 66.4 months (SD  $\pm$  35.9 months) with a minimum of 1 month and a maximum of 144 months. The commonly prescribed ART regimens were 1e and 1c, and opportunistic infections in the last one month prior to the data collection time were reported by 12(2.3%) of participants. (Table 3)

Table 3: HIV related factors of the ART clinic participants (n = 530)

| Variables                         |                   | Depression |          | p-value( $\chi^2$ ) |
|-----------------------------------|-------------------|------------|----------|---------------------|
|                                   |                   | No n(%)    | Yes n(%) |                     |
| Duration since knowing HIV status | Less than 5 years | 132(24.9)  | 19(3.6)  | 0.1                 |
|                                   | 5 years and above | 310(58.5)  | 69(13)   |                     |
| Duration of ART                   | Less than 5 years | 191(36)    | 33 (6.2) | 0.3                 |
|                                   | 5 years and above | 251(47.4)  | 55(10.4) |                     |
| ART drug regimen                  | 1c                | 166(31.3)  | 35(6.6)  | 0.8                 |
|                                   | 1d                | 54(10.2)   | 13(2.5)  |                     |
|                                   | 1e                | 197(37.2)  | 36(6.8)  |                     |
|                                   | 1f                | 25(4.7)    | 4(0.8)   |                     |
| Opportunistic infections          | Yes               | 4(0.8)     | 8(1.5)   | <0.001              |
|                                   | No                | 438(82.6)  | 80(15.1) |                     |
| CD4 level                         | Less than 500     | 228(43)    | 61(11.5) | 0.002               |
|                                   | 500 and above     | 214(40.4)  | 27(5.1)  |                     |

1c = Zidovudine (AZT) + Lamivudine (3TC) + Nevirapine (NVP); 1d = AZT + 3TC + Efavirenz (EFV); 1e = Tenofovir (TDF) + 3TC+EFV; 1f = TDF+3TC+NVP

### 3.4. Prevalence and associated factors of depression

The overall prevalence of depression was 13.3% (11.2 – 15.4%). The prevalence was significantly higher in people with HIV/AIDS, 16.6% (13.4 – 19.8%) as compared to the community sample, 9.7% (7.1 – 12.3%),  $p = 0.001$ . Variables significantly associated with depression were older age [AOR = 2.3, 95% CI: 1.1, 5.1], HIV positive sample [AOR = 1.7, 95% CI: 1.1, 2.6], being single [AOR = 1.9, 95% CI: 1.1, 3.5], divorced/widowed [AOR = 2.3, 95% CI: 1.5, 3.5], poor social support [AOR = 3.9, 95% CI: 1.7, 9.8]. (Table 4)

Table 4: Factors associated with depression (N=1026)

| Variables                               | Depression           |     | AOR (95% CI) | p-value               |         |
|-----------------------------------------|----------------------|-----|--------------|-----------------------|---------|
|                                         | No                   | Yes |              |                       |         |
| Sample type                             | Community sample     | 448 | 48           | 1                     |         |
|                                         | ART clinic sample    | 442 | 88           | <b>1.7(1.1 – 2.6)</b> | 0.01    |
| Sex                                     | Male                 | 370 | 46           | 1                     |         |
|                                         | Female               | 520 | 90           | 0.9(0.6 – 1.5)        | 0.84    |
| Age                                     | Less than 25 years   | 117 | 14           | 1                     |         |
|                                         | 25 – 44 years        | 609 | 78           | 1.1(0.5 – 2.1)        | 0.87    |
|                                         | 45 years and above   | 164 | 44           | <b>2.3(1.1 – 5.1)</b> | 0.03    |
| Khat chewing                            | Never                | 835 | 129          | 1                     |         |
|                                         | Yes                  | 55  | 7            | 0.9(0.4 – 2.1)        | 0.84    |
| Marital status                          | Married              | 467 | 44           | 1                     |         |
|                                         | Single               | 177 | 25           | <b>1.9(1.1 – 3.5)</b> | 0.03    |
|                                         | Divorced/widowed     | 246 | 67           | <b>2.3(1.5 – 3.5)</b> | < 0.001 |
| Problematic alcohol use                 | No                   | 805 | 123          | 1                     |         |
|                                         | Yes                  | 85  | 13           | 1.2(0.6 – 2.3)        | 0.59    |
| Social support                          | Poor support         | 393 | 81           | <b>3.9(1.7 – 9.6)</b> | 0.002   |
|                                         | Intermediate support | 398 | 49           | 2.4(0.96– 5.7)        | 0.06    |
|                                         | High support         | 99  | 6            | 1                     |         |
| Perceived quality of compared to others | Poor                 | 443 | 90           | 1.4(0.8 – 2.4)        | 0.19    |
|                                         | Not good – not bad   | 13  | 21           | 1.8(0.9 – 3.3)        | 0.08    |
|                                         | Good                 | 316 | 25           | 1                     |         |

## 4. Discussion

This study reported that the prevalence of depression is significantly higher in HIV-positive participants (16.6%) compared to the general population sample (9.7%). This variation was also indicated in the multivariable logistic regression analysis where the odds of depression in people with HIV/AIDS was 1.7 times higher than the community sample. The additional burdens in HIV-positive participants including opportunistic infections, ART drug side effects, and lowered level of CD4 count (54.5% of HIV-positive participants have less than 500 CD4) may contribute to this increased prevalence of depression in the HIV-positive sample. The finding is in-line with Chinese study 18.33%,<sup>37</sup> higher than Ugandan 8.1% and USA 12.2%<sup>38-39</sup> studies, and lower than the Cameroon study 26.7% and other sub-Saharan countries 26 – 28%.<sup>40-42</sup>

Multiple conditions including HIV-related stigma,<sup>43-45</sup> poor adherence to antiretroviral therapy,<sup>46-48</sup> and the direct effect of the virus itself<sup>49</sup> are possible reasons for the excess odds of depression in HIV-positive individuals. New perspectives towards non-medical services and resource allocation,<sup>50</sup> and interventions focusing on reduction of risk behavior and social stigma would decrease the prevalence of depression in HIV-positive individuals.<sup>51</sup> The advancements in HIV prevention and treatment are becoming promising in ending the HIV epidemic. However, this may be difficult to achieve without addressing depression and other mental health issues in HIV/AIDS care.

Marital status, age, and social support were important factors associated with depression in the overall sample of our study. The odds of depression in single and divorced/widowed participants was nearly twofold as compared to their married counterparts. Marital tragedies are the most stressful events<sup>52</sup> that can lead to a sense of insecurity and hopelessness. The odds of having

1  
2  
3 depression at the age of 45 years and above was more than twofold as compared to those with  
4  
5 younger age (25 years and below). Poor social support is also strongly and positively associated  
6  
7 with depression in which participants with poor social support were about 4 times more likely to  
8  
9 have depression as compared with high social support. Social interaction between family members  
10  
11 and the family's ability to react positively to life changes are important to reassuring individuals  
12  
13 and maintaining social cohesion.<sup>53</sup> On the other hand, if this social connectedness gets loose, the  
14  
15 individual might feel lonely and depressed. This finding is supported by the study in Ethiopia and  
16  
17 other sub-Saharan countries<sup>41 54</sup>.

18  
19  
20  
21  
22 In general, this study provided evidence about depression in HIV/AIDS patients by comparing it  
23  
24 with the general population. In the current study, gender, perceived quality of life, and substance  
25  
26 use (khat chewing and alcohol, do not involve intravenous administration) were not statistically  
27  
28 significant. However, recent finding indicates HIV-positive individuals with drug injection were  
29  
30 more likely to have depression<sup>55</sup>.

#### 31 32 33 34 35 4.1. Limitations

36  
37 The study has some limitations to take into consideration in interpretations of the result. The first  
38  
39 limitation is with matching. It would have been better if we did a matching of important variables  
40  
41 for depression such as sex and age in both groups. The other potential limitation is that we did not  
42  
43 conduct HIV testing in the general population comparison group to exclude those with positive  
44  
45 HIV test results. Though we excluded those who reported their HIV positive status in the  
46  
47 comparison group, we were not able to exclude those who are HIV positive but who did not know  
48  
49 their status.  
50  
51  
52  
53  
54  
55  
56  
57  
58  
59  
60



## 5. Conclusions

Depression is significantly higher in people with HIV/AIDS compared to the general population. The higher prevalence of depression in people with HIV/AIDS is an important public health issue to consider incorporating mental health care and screening in routine HIV/AIDS care.

## Declarations

### **Ethics approval and consent to participate**

Ethical clearance was obtained from the College of Medicine and Health Sciences ethical review committee of Bahir Dar University. Formal permission letter was obtained from the University and local administration. Participants were informed about the purpose of the study, confidentiality, and their rights to withdraw from the interview at any time they want. Informed consent was obtained from each participant. To maintain confidentiality, the questionnaire was anonymous, and the data were kept in a secure place.

### **Availability of data and material**

The data related to this research will be available upon reasonable request.

### **Competing Interests**

The authors declare that they have no competing interests.

### **Funding**

This research was supported by Bahir Dar University via Mecha Demographic Surveillance and Field Research Center, grant number (not applicable).

## Author Contributions

All authors (TM, HB, and WF) equally contributed from the conception to the completion of this project.

## Acknowledgment

We are very thankful to the study participants for their volunteer participation and Bahir Dar University for the financial support.

## Reference

1. Frank TD, Carter A, Jahagirdar D, et al. Global, regional, and national incidence, prevalence, and mortality of HIV, 1980–2017, and forecasts to 2030, for 195 countries and territories: a systematic analysis for the Global Burden of Diseases, Injuries, and Risk Factors Study 2017. *The lancet HIV* 2019;6(12):e831-e59. doi: 10.1016/S2352-3018(19)30196-1
2. UNAIDS. Global HIV & AIDS statistics — 2020 fact sheet, 2020.
3. Kang H-J, Kim S-Y, Bae K-Y, et al. Comorbidity of Depression with Physical Disorders: Research and Clinical Implications. *Chonnam Med J* 2015;51(1):8-18.
4. World Health Organization. Depression: A Global Crisis. World Mental Health Day, October 10 2012. *World Federation for Mental Health, Occoquan, Va, USA* 2012
5. Ciesla JA, Roberts JE. Meta-analysis of the relationship between HIV infection and risk for depressive disorders. *Am J Psychiatry* 2001;158(5):725-30. doi: 10.1176/appi.ajp.158.5.725
6. Jin H, Hampton Atkinson J, Yu X, et al. Depression and suicidality in HIV/AIDS in China. *J Affect Disord* 2006;94(1-3):269-75. doi: 10.1016/j.jad.2006.04.013
7. Rabkin JG. HIV and depression: 2008 review and update. *Curr HIV/AIDS Rep* 2008;5(4):163-71.
8. Nakasujja N, Skolasky RL, Musisi S, et al. Depression symptoms and cognitive function among individuals with advanced HIV infection initiating HAART in Uganda. *BMC Psychiatry* 2010;10:44. doi: 10.1186/1471-244x-10-44
9. Nakimuli-Mpungu E, Bass JK, Alexandre P, et al. Depression, alcohol use and adherence to antiretroviral therapy in sub-Saharan Africa: a systematic review. *AIDS Behav* 2012;16(8):2101-18. doi: 10.1007/s10461-011-0087-8
10. Rezaei S, Ahmadi S, Rahmati J, et al. Global prevalence of depression in HIV/AIDS: a systematic review and meta-analysis. *BMJ Supportive & Palliative Care* 2019;9(4):404. doi: 10.1136/bmjspcare-2019-001952
11. Eshun-Wilson I, Akena DH, Siegfried N, et al. Antidepressants for depression in adults with HIV infection. *Cochrane Database of Systematic Reviews*: John Wiley & Sons, Ltd 2014.
12. Leserman J. Role of depression, stress, and trauma in HIV disease progression. *Psychosom Med* 2008;70(5):539-45. doi: 10.1097/PSY.0b013e3181777a5f
13. Wagner GJ, Ghosh-Dastidar B, Dickens A, et al. Depression and its Relationship to Work Status and Income Among HIV Clients in Uganda. *World J AIDS* 2012;2(3):126-34. doi: 10.4236/wja.2012.23018

14. Amberbir A, Woldemichael K, Getachew S, et al. Predictors of adherence to antiretroviral therapy among HIV-infected persons: a prospective study in Southwest Ethiopia. *BMC Public Health* 2008;8:265. doi: 10.1186/1471-2458-8-265
15. Bhatia MS, Munjal S. Prevalence of Depression in People Living with HIV/AIDS Undergoing ART and Factors Associated with it. *J Clin Diagn Res* 2014;8(10):WC01-04. doi: 10.7860/jcdr/2014/7725.4927
16. Hailemariam S, Tessema F, Asefa M, et al. The prevalence of depression and associated factors in Ethiopia: findings from the National Health Survey. *Int J Ment Health Syst* 2012;6(1):23. doi: 10.1186/1752-4458-6-23
17. Kamen C, Arganbright J, Kienitz E, et al. HIV-related stigma: implications for symptoms of anxiety and depression among Malawian women. *Afr J AIDS Res* 2015;14(1):67-73. doi: 10.2989/16085906.2015.1016987
18. Oladeji BD, Taiwo B, Mosuro O, et al. Suicidal Behavior and Associations with Quality of Life among HIV/AIDS-Infected Patients in Ibadan, Nigeria. *J Int Assoc Provid AIDS Care* 2015 doi: 10.1177/2325957415617829
19. Tran BX, Dang AK, Truong NT, et al. Depression and Quality of Life among Patients Living with HIV/AIDS in the Era of Universal Treatment Access in Vietnam. *Int J Environ Res Public Health* 2018;15(12):2888. doi: 10.3390/ijerph15122888
20. Chibanda D, Cowan F, Gibson L, et al. Prevalence and correlates of probable common mental disorders in a population with high prevalence of HIV in Zimbabwe. *BMC Psychiatry* 2016;16(1):55. doi: 10.1186/s12888-016-0764-2
21. Asch SM, Kilbourne AM, Gifford AL, et al. Underdiagnosis of depression in HIV: who are we missing? *J Gen Intern Med* 2003;18(6):450-60. doi: 10.1046/j.1525-1497.2003.20938.x [published Online First: 2003/06/26]
22. Andersen L, Kagee A, O'Cleirigh C, et al. Understanding the experience and manifestation of depression in people living with HIV/AIDS in South Africa. *AIDS Care* 2015;27(1):59-62. doi: 10.1080/09540121.2014.951306
23. Collins PY, Holman AR, Freeman MC, et al. What is the relevance of mental health to HIV/AIDS care and treatment programs in developing countries? A systematic review. *AIDS* 2006;20(12):1571-82. doi: 10.1097/01.aids.0000238402.70379.d4
24. Odokonyero R, Wagner G, Ngo V, et al. Giving "Sadness" a Name: The Need for Integrating Depression Treatment into HIV Care in Uganda. *J Int Assoc Provid AIDS Care* 2015;14(2):108-11. doi: 10.1177/2325957414557265
25. Beyene Gebrezgiabher B, Huluf Abraha T, Hailu E, et al. Depression among Adult HIV/AIDS Patients Attending ART Clinics at Aksum Town, Aksum, Ethiopia: A Cross-Sectional Study. *Depression research and treatment* 2019;2019:3250431. doi: 10.1155/2019/3250431 [published Online First: 2019/03/14]
26. Abadiga M. Depression and its associated factors among HIV/AIDS patients attending ART clinics at Gimbi General hospital, West Ethiopia, 2018. *BMC research notes* 2019;12(1):527. doi: 10.1186/s13104-019-4553-0 [published Online First: 2019/08/21]
27. Duko B, Geja E, Zewude M, et al. Prevalence and associated factors of depression among patients with HIV/AIDS in Hawassa, Ethiopia, cross-sectional study. *Annals of general psychiatry* 2018;17:45. doi: 10.1186/s12991-018-0215-1 [published Online First: 2018/11/06]
28. Mekuria LA, Sprangers MA, Prins JM, et al. Health-related quality of life of HIV-infected adults receiving combination antiretroviral therapy in Addis Ababa. *AIDS Care* 2015;27(8):934-45. doi: 10.1080/09540121.2015.1020748 [published Online First: 2015/03/19]

29. Gelaye B, Williams MA, Lemma S, et al. Validity of the Patient Health Questionnaire-9 for depression screening and diagnosis in East Africa. *Psychiatry Res* 2013;210(2):653-61. doi: 10.1016/j.psychres.2013.07.015
30. Kroenke K, Spitzer RL, Williams JBW. The PHQ-9. *J Gen Intern Med* 2001;16(9):606-13. doi: 10.1046/j.1525-1497.2001.016009606.x
31. Abiola T, Udofia O, Zakari M, et al. Psychometric properties of the 3-item Oslo Social Support scale among clinical students of Bayero University Kano, Nigeria. *Malaysian Journal of Psychiatry* 2013;22(2):32-41.
32. Murphy B, Herrman H, Hawthorne G, et al. Australian WHOQoL instruments: User's manual and interpretation guide. *Melbourne, Australia: Australian WHOQOL Field Study Centre* 2000
33. Fekadu A, Medhin G, Selamu M, et al. Population level mental distress in rural Ethiopia. *BMC Psychiatry* 2014;14(1):194. doi: 10.1186/1471-244X-14-194
34. Bradley KA, Bush KR, Epler AJ, et al. Two brief alcohol-screening tests From the Alcohol Use Disorders Identification Test (AUDIT): validation in a female Veterans Affairs patient population. *Arch Intern Med* 2003;163(7):821-29. doi: 10.1001/archinte.163.7.821
35. Bush K, Kivlahan DR, McDonnell MB, et al. The AUDIT alcohol consumption questions (AUDIT-C): an effective brief screening test for problem drinking. Ambulatory Care Quality Improvement Project (ACQUIP). Alcohol Use Disorders Identification Test. *Arch Intern Med* 1998;158(16):1789-95.
36. Sperandei S. Understanding logistic regression analysis. *Biochem Med (Zagreb)* 2014;24(1):12-18. doi: 10.11613/BM.2014.003
37. Jiang Y, Wang M, Wei XQ, et al. [Prevalence of depression and related factors in 180 HIV/AIDS patients receiving highly active antiretroviral therapy]. *Zhonghua Liu Xing Bing Xue Za Zhi* 2016;37(5):638-42.
38. Kinyanda E, Hoskins S, Nakku J, et al. Prevalence and risk factors of major depressive disorder in HIV/AIDS as seen in semi-urban Entebbe district, Uganda. *BMC Psychiatry* 2011;11:205. doi: 10.1186/1471-244X-11-205
39. Skalski LM, Watt MH, MacFarlane JC, et al. Mental Health and Substance Use Among Patients in a North Carolina HIV Clinic. *N C Med J* 2015;76(3):148-55. doi: 10.18043/nmc.76.3.148
40. Ngum PA, Fon PN, Ngu RC, et al. Depression Among HIV/AIDS Patients on Highly Active Antiretroviral Therapy in the Southwest Regional Hospitals of Cameroon: A Cross-Sectional Study. *Neurol Ther* 2017;6(1):103-14. doi: 10.1007/s40120-017-0065-9
41. Seth P, Kidder D, Pals S, et al. Psychosocial functioning and depressive symptoms among HIV-positive persons receiving care and treatment in Kenya, Namibia, and Tanzania. *Prev Sci* 2014;15(3):318-28. doi: 10.1007/s11121-013-0420-8
42. Olley BO, Seedat S, Stein DJ. Persistence of psychiatric disorders in a cohort of HIV/AIDS patients in South Africa: a 6-month follow-up study. *J Psychosom Res* 2006;61(4):479-84. doi: 10.1016/j.jpsychores.2006.03.010
43. Endeshaw M, Walson J, Rawlins S, et al. Stigma in Ethiopia: association with depressive symptoms in people with HIV. *AIDS Care* 2014;26(8):935-39. doi: 10.1080/09540121.2013.869537
44. Nachega JB, Morroni C, Zuniga JM, et al. HIV-related stigma, isolation, discrimination, and serostatus disclosure: a global survey of 2035 HIV-infected adults. *J Int Assoc Physicians AIDS Care (Chic)* 2012;11(3):172-78. doi: 10.1177/1545109712436723
45. Onyebuchi-Iwudibia O, Brown A. HIV and depression in Eastern Nigeria: the role of HIV-related stigma. *AIDS Care* 2014;26(5):653-57. doi: 10.1080/09540121.2013.844761
46. Malow R, Dévieux JG, Stein JA, et al. Depression, substance abuse and other contextual predictors of adherence to antiretroviral therapy (ART) among Haitians. *AIDS Behav* 2013;17(4):1221-30. doi: 10.1007/s10461-012-0400-1

- 1  
2  
3 47. Sin NL, DiMatteo MR. Depression treatment enhances adherence to antiretroviral therapy: a meta-  
4 analysis. *Ann Behav Med* 2014;47(3):259-69. doi: 10.1007/s12160-013-9559-6  
5  
6 48. Wroe EB, Hedt-Gauthier BL, Franke MF, et al. Depression and patterns of self-reported adherence to  
7 antiretroviral therapy in Rwanda. *Int J STD AIDS* 2015;26(4):257-61. doi:  
8 10.1177/0956462414535206  
9  
10 49. Del Guerra FB, Fonseca JLI, Figueiredo VM, et al. Human immunodeficiency virus-associated  
11 depression: contributions of immuno-inflammatory, monoaminergic, neurodegenerative, and  
12 neurotrophic pathways. *J Neurovirol* 2013;19(4):314-27. doi: 10.1007/s13365-013-0177-7  
13  
14 50. Tran BX, Do HP, Hall B, et al. The Use of Health Behavioral Theories in HIV/AIDS Research: A  
15 Bibliometric Analysis (Gap Research). *AIDS reviews* 2019;21(2):93-107. doi:  
16 10.24875/AIDSRev.19000062 [published Online First: 2019/07/25]  
17  
18 51. Tran BX, Ho RCM, Ho CSH, et al. Depression among Patients with HIV/AIDS: Research Development  
19 and Effective Interventions (GAPRESEARCH). *Int J Environ Res Public Health* 2019;16(10) doi:  
20 10.3390/ijerph16101772 [published Online First: 2019/05/22]  
21  
22 52. Holmes TH, Rahe RH. The social readjustment rating scale. *J Psychosom Res* 1967;11(2):213-18. doi:  
23 [https://doi.org/10.1016/0022-3999\(67\)90010-4](https://doi.org/10.1016/0022-3999(67)90010-4)  
24  
25 53. Wouters E, Masquillier C, le Roux Booyesen F. The Importance of the Family: A Longitudinal Study of  
26 the Predictors of Depression in HIV Patients in South Africa. *AIDS Behav* 2016 doi:  
27 10.1007/s10461-016-1294-0  
28  
29 54. Tesfaw G, Ayano G, Awoke T, et al. Prevalence and correlates of depression and anxiety among  
30 patients with HIV on-follow up at Alert Hospital, Addis Ababa, Ethiopia. *BMC Psychiatry*  
31 2016;16(1):368. doi: 10.1186/s12888-016-1037-9  
32  
33 55. Than PQT, Tran BX, Nguyen CT, et al. Stigma against patients with HIV/AIDS in the rapid expansion of  
34 antiretroviral treatment in large drug injection-driven HIV epidemics of Vietnam. *Harm Reduction*  
35 *Journal* 2019;16(1):6. doi: 10.1186/s12954-019-0277-7  
36  
37  
38  
39  
40  
41  
42  
43  
44  
45  
46  
47  
48  
49  
50  
51  
52  
53  
54  
55  
56  
57  
58  
59  
60

## Depression among people with HIV/AIDS in Northwest Ethiopia: A comparative cross-sectional study

Tesfa Mekonen<sup>1,\*</sup>, Habte Belete<sup>1</sup>, Wubalem Fekadu<sup>1,2</sup>

<sup>1</sup>Department of Psychiatry, College of Medicine and Health Sciences, Bahir Dar University, Bahir Dar, Ethiopia

<sup>2</sup>Department of Psychiatry, College of Health Sciences, Addis Ababa University, Addis Ababa, Ethiopia

### STROBE 2007 (v4) Statement—Checklist of items that should be included in reports of *cross-sectional studies*

| Section/Topic            | Item # | Recommendation                                                                                                                                                                       | Reported on page # |
|--------------------------|--------|--------------------------------------------------------------------------------------------------------------------------------------------------------------------------------------|--------------------|
| Title and abstract       | 1      | (a) Indicate the study's design with a commonly used term in the title or the abstract                                                                                               | 1                  |
|                          |        | (b) Provide in the abstract an informative and balanced summary of what was done and what was found                                                                                  | 2                  |
| <b>Introduction</b>      |        |                                                                                                                                                                                      |                    |
| Background/rationale     | 2      | Explain the scientific background and rationale for the investigation being reported                                                                                                 | 3 & 4              |
| Objectives               | 3      | State specific objectives, including any prespecified hypotheses                                                                                                                     | 4                  |
| <b>Methods</b>           |        |                                                                                                                                                                                      |                    |
| Study design             | 4      | Present key elements of study design early in the paper                                                                                                                              | 5                  |
| Setting                  | 5      | Describe the setting, locations, and relevant dates, including periods of recruitment, exposure, follow-up, and data collection                                                      | 5                  |
| Participants             | 6      | (a) Give the eligibility criteria, and the sources and methods of selection of participants                                                                                          | 5                  |
| Variables                | 7      | Clearly define all outcomes, exposures, predictors, potential confounders, and effect modifiers. Give diagnostic criteria, if applicable                                             | 6                  |
| Data sources/measurement | 8      | For each variable of interest, give sources of data and details of methods of assessment (measurement). Describe comparability of assessment methods if there is more than one group | 6 & 7              |
| Bias                     | 9      | Describe any efforts to address potential sources of bias                                                                                                                            | 5, 6 & 7           |
| Study size               | 10     | Explain how the study size was arrived at                                                                                                                                            | 5 & 6              |
| Quantitative variables   | 11     | Explain how quantitative variables were handled in the analyses. If applicable, describe which groupings were chosen and why                                                         | 7                  |
| Statistical methods      | 12     | (a) Describe all statistical methods, including those used to control for confounding                                                                                                | 7                  |

|                          |     |                                                                                                                                                                                                              |         |
|--------------------------|-----|--------------------------------------------------------------------------------------------------------------------------------------------------------------------------------------------------------------|---------|
|                          |     | (b) Describe any methods used to examine subgroups and interactions                                                                                                                                          | N/A     |
|                          |     | (c) Explain how missing data were addressed                                                                                                                                                                  | N/A     |
|                          |     | (d) If applicable, describe analytical methods taking account of sampling strategy                                                                                                                           | N/A     |
|                          |     | (e) Describe any sensitivity analyses                                                                                                                                                                        | N/A     |
| <b>Results</b>           |     |                                                                                                                                                                                                              |         |
| Participants             | 13  | (a) Report numbers of individuals at each stage of study—eg numbers potentially eligible, examined for eligibility, confirmed eligible, included in the study, completing follow-up, and analysed            | 7       |
|                          |     | (b) Give reasons for non-participation at each stage                                                                                                                                                         | 7       |
|                          |     | (c) Consider use of a flow diagram                                                                                                                                                                           | N/A     |
| Descriptive data         | 14* | (a) Give characteristics of study participants (eg demographic, clinical, social) and information on exposures and potential confounders                                                                     | 7 – 10  |
|                          |     | (b) Indicate number of participants with missing data for each variable of interest                                                                                                                          | N/A     |
| Outcome data             | 15  | Report numbers of outcome events or summary measures                                                                                                                                                         | 11      |
| Main results             | 16  | (a) Give unadjusted estimates and, if applicable, confounder-adjusted estimates and their precision (eg, 95% confidence interval). Make clear which confounders were adjusted for and why they were included | 11      |
|                          |     | (b) Report category boundaries when continuous variables were categorized                                                                                                                                    | 11      |
|                          |     | (c) If relevant, consider translating estimates of relative risk into absolute risk for a meaningful time period                                                                                             | N/A     |
| Other analyses           | 17  | Report other analyses done—eg analyses of subgroups and interactions, and sensitivity analyses                                                                                                               | N/A     |
| <b>Discussion</b>        |     |                                                                                                                                                                                                              |         |
| Key results              | 18  | Summarise key results with reference to study objectives                                                                                                                                                     | 12      |
| Limitations              | 19  | Discuss limitations of the study, taking into account sources of potential bias or imprecision. Discuss both direction and magnitude of any potential bias                                                   | 13      |
| Interpretation           | 20  | Give a cautious overall interpretation of results considering objectives, limitations, multiplicity of analyses, results from similar studies, and other relevant evidence                                   | 12 – 14 |
| Generalisability         | 21  | Discuss the generalisability (external validity) of the study results                                                                                                                                        | 12 – 14 |
| <b>Other information</b> |     |                                                                                                                                                                                                              |         |
| Funding                  | 22  | Give the source of funding and the role of the funders for the present study and, if applicable, for the original study on which the present article is based                                                | 14      |



# BMJ Open

## Depressive symptoms among people with HIV/AIDS in Northwest Ethiopia: Comparative study

|                                 |                                                                                                                                                                                                                                                       |
|---------------------------------|-------------------------------------------------------------------------------------------------------------------------------------------------------------------------------------------------------------------------------------------------------|
| Journal:                        | <i>BMJ Open</i>                                                                                                                                                                                                                                       |
| Manuscript ID                   | bmjopen-2021-048931.R1                                                                                                                                                                                                                                |
| Article Type:                   | Original research                                                                                                                                                                                                                                     |
| Date Submitted by the Author:   | 10-Apr-2021                                                                                                                                                                                                                                           |
| Complete List of Authors:       | Mekonen , Tesfa; Bahir Dar University, Department of Psychiatry<br>Belete, Habte; Bahir Dar University, Department of Psychiatry<br>Fekadu, Wubalem; Bahir Dar University, Department of Psychiatry; Addis Ababa University, Department of Psychiatry |
| <b>Primary Subject Heading</b>: | Mental health                                                                                                                                                                                                                                         |
| Secondary Subject Heading:      | HIV/AIDS, Public health, Epidemiology                                                                                                                                                                                                                 |
| Keywords:                       | Depression & mood disorders < PSYCHIATRY, HIV & AIDS < INFECTIOUS DISEASES, MENTAL HEALTH                                                                                                                                                             |
|                                 |                                                                                                                                                                                                                                                       |

SCHOLARONE™  
Manuscripts





I, the Submitting Author has the right to grant and does grant on behalf of all authors of the Work (as defined in the below author licence), an exclusive licence and/or a non-exclusive licence for contributions from authors who are: i) UK Crown employees; ii) where BMJ has agreed a CC-BY licence shall apply, and/or iii) in accordance with the terms applicable for US Federal Government officers or employees acting as part of their official duties; on a worldwide, perpetual, irrevocable, royalty-free basis to BMJ Publishing Group Ltd ("BMJ") its licensees and where the relevant Journal is co-owned by BMJ to the co-owners of the Journal, to publish the Work in this journal and any other BMJ products and to exploit all rights, as set out in our [licence](#).

The Submitting Author accepts and understands that any supply made under these terms is made by BMJ to the Submitting Author unless you are acting as an employee on behalf of your employer or a postgraduate student of an affiliated institution which is paying any applicable article publishing charge ("APC") for Open Access articles. Where the Submitting Author wishes to make the Work available on an Open Access basis (and intends to pay the relevant APC), the terms of reuse of such Open Access shall be governed by a Creative Commons licence – details of these licences and which [Creative Commons](#) licence will apply to this Work are set out in our licence referred to above.

Other than as permitted in any relevant BMJ Author's Self Archiving Policies, I confirm this Work has not been accepted for publication elsewhere, is not being considered for publication elsewhere and does not duplicate material already published. I confirm all authors consent to publication of this Work and authorise the granting of this licence.

1  
2  
3 **1 Depressive symptoms among people with HIV/AIDS in Northwest Ethiopia:**  
4  
5  
6 **2 Comparative study**  
7

8  
9  
10 3 Tesfa Mekonen<sup>1,\*</sup>, Habte Belete<sup>1</sup>, Wubalem Fekadu<sup>1,2</sup>  
11

12 4 <sup>1</sup>Department of Psychiatry, College of Medicine and Health Sciences, Bahir Dar University, Bahir Dar, Ethiopia  
13

14 5 <sup>2</sup>Department of Psychiatry, College of Health Sciences, Addis Ababa University, Addis Ababa, Ethiopia  
15

16 6  
17  
18 7 \*Correspondence  
19

20 8 Tesfa Mekonen: [smarthope1@gmail.com](mailto:smarthope1@gmail.com)  
21  
22

23 9  
24 10 Word count: 2,359  
25  
26  
27  
28  
29  
30  
31  
32  
33  
34  
35  
36  
37  
38  
39  
40  
41  
42  
43  
44  
45  
46  
47  
48  
49  
50  
51  
52  
53  
54  
55  
56  
57  
58  
59  
60

## Abstract

**Objectives:** The objective of this study was to compare depressive symptoms among people with HIV/AIDS and the general population sample. We also assessed the factors associated with depressive symptoms.

**Design:** A comparative cross-sectional study was conducted.

**Settings:** Antiretroviral therapy clinics in three primary healthcare facilities and semi-urban area in Northwest Ethiopia.

**Participants:** A total of 1115 participants (558 people with HIV/AIDS and 557 comparison group) aged 18 years and above were recruited. A total of 1,026 participants (530 people with HIV/AIDS and 496 comparison group) completed the interview. We excluded people with known HIV-positive status from the general comparison group.

**Outcome measure:** Patient Health Questionnaire (PHQ-9) was used to assess depressive symptoms. The proportion of depressive symptoms was compared between samples of the general population and people living with HIV/AIDS using chi-squared statistics. Multivariable logistic regression analysis was done to examine the associated factors.

**Results:** The overall prevalence of depressive symptoms was 13.3% (11.2 – 15.4%). The prevalence was significantly higher in people living with HIV/AIDS compared to the community sample (16.6% Vs 12.3%),  $p = 0.001$ . The difference was also significant in the multivariable logistic regression (odds ratio = 1.7). For the overall sample, depressive symptoms were significantly associated with older age, being single, marital status, and poor social support.

**Conclusions:** Depressive symptoms were higher in people with HIV/AIDS compared to the general population. It is necessary to include mental healthcare and screening for depression in routine HIV/AIDS care.

**Keywords:** Depression, HIV/AIDS, Comparative study; Co-morbidity; Ethiopia

## 48 **Strengths and limitations of this study**

- 49 • Having a comparison group is one of the strengths of this study.
- 50 • Matching of variables between the study and comparison group was not employed.
- 51 • We were not able to exclude those who are HIV positive but who did not know their status  
52 in the comparison group.
- 53 • Due to the cross-sectional nature of the study, we cannot report causal relationships.

## 55 **1. Introduction**

56 HIV/AIDS continues to be a global public health threat with more than 75 million infections and  
57 32 million AIDS-related deaths since the start of the epidemic.<sup>1 2</sup> On the other hand, depression  
58 is also a major public health issue and has been considered as a global crisis because of its high  
59 contribution to the disease burden, high comorbidities with other medical conditions, and  
60 associated disabilities.<sup>3 4</sup> The comorbidity of depression and HIV/AIDS is common that ranged  
61 between 12% - 63%.<sup>5-7</sup> This was more pronounced in low resource settings, particularly in Sub-  
62 Saharan Africa.<sup>8 9</sup> A global systematic review and meta-analysis also reported that 31% of people  
63 with HIV/AIDS had depression.<sup>10</sup> The prevalence of depression in people with HIV/AIDS has  
64 been reported as at least twice that of the general population.<sup>5 11</sup> The comorbidity between  
65 depression and HIV/AIDS has significant consequences in reducing antiretroviral therapy (ART)  
66 response that leads to poor quality of life.<sup>12-14</sup>

67 The magnitude of depression among HIV/AIDS patients is disproportionately high and its effect  
68 is mostly associated with poor disease progress and poor quality of life. This comorbidity is  
69 associated with multiple factors including sociodemographic, psychosocial, and clinical factors.<sup>15-</sup>

1  
2  
3 70 <sup>18</sup> For instance, people living with HIV who received ART without HIV counseling and testing  
4  
5 71 services are more likely to develop depression.<sup>19</sup> Female gender and recent negative life events are  
6  
7 72 also known contributors to depression in HIV/AIDS patients.<sup>20</sup> However, depression remains  
8  
9 73 underdiagnosed in people with HIV/AIDS.<sup>21</sup>  
10  
11  
12

13 74 Depression can be prevented and treated with available resources at the primary care level. This  
14  
15 75 can be achieved by early detection of depression and identifying important factors associated with  
16  
17 76 depression. To prevent and manage depression in HIV/AIDS, the most important contributing  
18  
19 77 factors need to be explored. Despite the high prevalence and negative consequences of depression  
20  
21 78 among HIV-positive individuals, there is substandard care for depression in most low-income  
22  
23 79 countries HIV care programs.<sup>22-24</sup>  
24  
25  
26  
27

28 80 In Ethiopia, the prevalence of depression was reported 14.6 – 48.6% among people living with  
29  
30 81 HIV/AIDS<sup>25-27</sup> and 9.1% in the general population.<sup>16</sup> However, there was no study that compares  
31  
32 82 depression in HIV-positive people and general population. It is important to see if there is any  
33  
34 83 significant difference in prevalence and possible modifiable factors of depressive symptoms  
35  
36 84 between HIV-positive people and the general population. Therefore, the objectives of this study  
37  
38 85 were:  
39  
40  
41

- 42 86 1. To assess the level of depressive symptoms among HIV-positive individuals in the ART  
43  
44 87 clinic compared to the general population.
- 45  
46 88 2. To identify factors associated with depressive symptoms in HIV-positive people and the  
47  
48 89 general population.
- 49  
50  
51  
52  
53  
54  
55  
56  
57  
58  
59  
60

## 2. Methods and materials

### 2.1. Study design and setting

A comparative cross-sectional study was conducted in Mecha Demographic Surveillance and Field Research Center (MDSFRC). The site is located in Mecha district, Northwest Ethiopia, which is 540 kilometers away from Addis Ababa. MDSFRC is one of the newly established research centers in Bahir Dar University. We recruited people with HIV/AIDS from the adult ART clinics in the district and the comparisons from the general population.

### 2.2. Participants

People living with HIV/AIDS aged 18 years and above (69.8% Female) in the adult ART clinics of the district were included in the study group. For the general population comparison group, adult residents of Merawi town (a town in Mecha district) aged 18 years and above (48.4% Female) who resided for at least six months were included. In the comparison group, individuals with known HIV-positive status were excluded.

### 2.3. Data collection and procedures

Data collection was conducted through face-to-face interviews by trained data collectors in March 2018. Clinical data were retrieved from the participants' medical records. Participants were assured of confidentiality and the anonymity of the questionnaire. Supervisors and data collectors counterchecked the questionnaire every day for its completeness. Sample size was calculated using Epi-Info by considering 80% power, 95% confidence interval, 9.1% depression in the general population,<sup>16</sup> 14.9% depression in HIV positive people,<sup>28</sup> 10% non-response rate, and 1:1 ratio of the study and comparative groups to detect 1.7 odds of depression in the study group. The final sample size was 1115 (558 people with HIV/AIDS and 557 comparison group).

1  
2  
3 112 In the community comparison group, we selected administrative villages from Merawi town by  
4  
5 113 multi-stage sampling method. We randomly selected the households from the administrative  
6  
7 114 villages using the registration of MDSFRC. We selected one participant using lottery method for  
8  
9  
10 115 those households with more than one eligible participant. For the study group, around 1200  
11  
12 116 individuals were estimated to attend their ART follow up during the data collection period. We  
13  
14 117 used a systematic random sampling method to select participants in every two individuals based  
15  
16  
17 118 on their appointment from the ART clinic registration logbook.  
18  
19

## 20 119 2.4. Variables and Measurements

21  
22  
23 120 We measured depressive symptoms by Patient Health Questionnaire-9 (PHQ-9). PHQ-9 is a tool  
24  
25 121 with nine items and validated in the Ethiopian population with good psychometric properties (86%  
26  
27 122 sensitivity and 67% specificity with 10 cut-off point)<sup>29</sup>. Severity of depressive symptoms were  
28  
29 123 also described based on PHQ-9 score (0 – 4 = no depressive symptoms, 5 – 9 = mild depressive  
30  
31 124 symptoms, 10 – 14 = moderate depressive symptoms, 15 – 19 = moderately severe symptoms, and  
32  
33 125 20+ = severe depressive symptoms).<sup>30</sup> The tool also had good reliability in the current study  
34  
35  
36 126 (Cronbach's Alpha = 0.79). We have used PHQ-9 at cut off score of 10 to identify depressive  
37  
38  
39 127 symptoms that require clinical intervention (moderate to severe depressive symptoms).  
40  
41

42 128 The independent variables were:

43  
44 129 Socio-demographic variables: sex, age, marital status, educational status, perceived relative  
45  
46 130 income

47  
48 131 Psychosocial variables: social support, alcohol abuse, and khat chewing

49  
50 132 HIV related variables: CD4 level, duration of HIV-positive status and ART use, ART regimen,  
51  
52 133 and presence of opportunistic infections  
53  
54  
55  
56  
57  
58  
59  
60

1  
2  
3 134 Social support was assessed using Oslo Social Support Scale (OSSS-3), three items scale, has a  
4  
5 135 sum score ranges from 3 – 14 (poor social support = 3 – 8, intermediate social support = 9 – 11,  
6  
7 136 and strong social support = 12 – 14).<sup>31</sup> Perceived general quality of life was assessed by asking the  
8  
9 137 participants to rate their quality of life, adapted from the World Health Organization's quality of  
10  
11 138 life assessment tool.<sup>32</sup> Relative wealth of the participants was assessed by asking what they  
12  
13 139 perceived about their wealth in relation to others in their neighborhood.<sup>33</sup> Problematic alcohol use  
14  
15 140 was assessed by Alcohol Use Disorder Identification Test-Consumption (AUDIT – C) which is a  
16  
17 141 3-items scale with 72% specificity and 86% sensitivity for men, and 94% specificity and 66%  
18  
19 142 sensitivity for women.<sup>34 35</sup>

## 143 2.5. Analysis

144 Data entry was done with Epi info version 7(double entry) and analysis was done with SPSS-21.  
145 Chi-squared test was used to compare simple frequencies in between groups. We ran univariate  
146 logistic regression for each variable to select variables (p-value < 0.2) for the final model<sup>36</sup>.  
147 Multivariable logistic regression analysis was done to identify the associated variables. The  
148 strength of associations was indicated by OR (odds ratio) with a 95% confidence interval.  
149 Variables with p-values < 0.05 were considered as statistically significant.

## 150 2.6. Patient and public involvement

151 The participants were not involved in the design, conduct, reporting, or dissemination plans of this  
152 research.

## 153 3. Results

### 154 3.1. Socio-demographic characteristics of the participants

155 From the total of 1,115 participants, 1026(496 from the general population and 530 from the ART  
156 clinics) agreed to participate in the study. The reasons for non-response were lack of time to



157 complete the interview (n = 47), no interest to participate (n = 23), and withdraw the interview  
 158 without giving reason (n = 19). The mean age of participants was 38.85 years (SD ± 10.72) and  
 159 most of them were in the age group of 25 – 44 years. The overall divorce and widow rates were  
 160 22.9% and 7.6% respectively. This is significantly higher in the HIV positive sample (18.3% and  
 161 11.3%) as compared with the community sample (4.6% and 3.6%), p < 0.001. (Table 1)

162 Table 1: Socio-demographic characteristics of the respondents (N = 1026)

| Variables                        | Sample type            |           | Overall   |                     |         |
|----------------------------------|------------------------|-----------|-----------|---------------------|---------|
|                                  | Community n(%)         | HIV n(%)  | N(%)      | p-value( $\chi^2$ ) |         |
| Sex                              | Male                   | 256(51.6) | 160(30.2) | 416(40.5)           | < 0.001 |
|                                  | Female                 | 240(48.4) | 370(69.8) | 610(59.5)           |         |
| Age                              | < 25 years             | 109(22)   | 22(4.2)   | 131(12.8)           | < 0.001 |
|                                  | 25 – 44 years          | 305(61.5) | 382(72.1) | 687(67)             |         |
|                                  | Above 44 years         | 82(16.5)  | 126(23.8) | 208(20.3)           |         |
| Family size                      | One (alone)            | 100(20.2) | 124(23.4) | 224(21.8)           | 0.29    |
|                                  | Two to five            | 352(71)   | 369(69.6) | 721(70.3)           |         |
|                                  | More than five         | 44(8.9)   | 37(7)     | 81(7.9)             |         |
| Family income compared to others | Better                 | 20(4)     | 13(2.5)   | 33(3.2)             | < 0.001 |
|                                  | Average                | 257(51.8) | 138(26)   | 395(38.5)           |         |
|                                  | Poor                   | 219(44.2) | 379(71.5) | 598(58.3)           |         |
| Marital status                   | Married                | 276(55.6) | 235(44.3) | 511(49.8)           | < 0.001 |
|                                  | Single                 | 155(31.3) | 47(9.5)   | 202(19.7)           |         |
|                                  | Divorced               | 47(4.6)   | 188(18.3) | 235(22.9)           |         |
|                                  | Widowed                | 18(3.6)   | 60(11.3)  | 78(7.6)             |         |
| Education                        | Unable to read & write | 138(27.8) | 165(31.1) | 303(29.5)           | 0.2     |
|                                  | Informal education     | 61(12.3)  | 79(14.9)  | 140(13.6)           |         |
|                                  | Elementary school      | 99(20)    | 103(19.4) | 202(19.7)           |         |
|                                  | Secondary school       | 126(25.4) | 106(20)   | 232(22.6)           |         |
|                                  | College and above      | 72(15.5)  | 77(14.5)  | 149(14.5)           |         |

163

164

### 3.2. Psychosocial and related characteristics

Khat (*Catha edulis*, evergreen, psychoactive leaf which is commonly cultivated in East Africa) was chewed by 6% of participants (9.5% in the community sample and 2.8% in the HIV sample);  $p < 0.001$ . The HIV positive participants reported relatively good social support as compared to the community participants. (Table 2)

Table 2: Psychosocial factors of the participants (N = 1026)

| Variables               | Sample type          |           | Overall N(%) | p-value( $\chi^2$ ) |         |
|-------------------------|----------------------|-----------|--------------|---------------------|---------|
|                         | Community n(%)       | HIV n(%)  |              |                     |         |
| Khat chewing            | Never                | 449(90.5) | 515(97.2)    | 964(94)             | < 0.001 |
|                         | Yes                  | 47(9.5)   | 15(2.8)      | 62(6)               |         |
| Problematic alcohol use | No                   | 427(86.1) | 501(94.5)    | 928(90.4)           | < 0.001 |
|                         | Yes                  | 69(13.9)  | 29(5.5)      | 98(9.6)             |         |
| Social support          | Poor support         | 259(52.2) | 215(40.6)    | 474(46.2)           | < 0.001 |
|                         | Intermediate support | 201(40.5) | 246(46.4)    | 447(43.6)           |         |
|                         | Strong support       | 36(7.3)   | 69(13)       | 105(10.2)           |         |
| Depressive symptoms     | None/mild            | 448(90.3) | 442(83.4)    | 890(86.7)           | 0.001   |
|                         | Moderate             | 23(4.6)   | 62(11.7)     | 85(8.3)             |         |
|                         | Moderately severe    | 21(4.2)   | 24(4.5)      | 45(4.4)             |         |
|                         | Severe               | 4(0.8)    | 2(0.4)       | 6(0.6)              |         |

172

173

### 174 3.3. HIV and other related characteristics of HIV positive 175 participants

176 The median duration since HIV status determined was 84 months (interquartile range = 60 months)  
177 with a minimum of 2 months and a maximum of 159 months. The median duration since ART  
178 started was 60 months (interquartile range = 60 months) with a minimum of 1 month and a  
179 maximum of 144 months. The commonly prescribed ART regimens were 1e and 1c, and  
180 opportunistic infections in the last one month prior to the data collection time were reported by  
181 12(2.3%) of participants. (Table 3)

182 Table 3: HIV related factors of the ART clinic participants (n = 530)  
183

| Variables                         |                   | Depressive symptoms |          | p-value( $\chi^2$ ) |
|-----------------------------------|-------------------|---------------------|----------|---------------------|
|                                   |                   | No n(%)             | Yes n(%) |                     |
| Duration since knowing HIV status | Less than 5 years | 132(24.9)           | 19(3.6)  | 0.1                 |
|                                   | 5 years and above | 310(58.5)           | 69(13)   |                     |
| Duration of ART                   | Less than 5 years | 191(36)             | 33 (6.2) | 0.3                 |
|                                   | 5 years and above | 251(47.4)           | 55(10.4) |                     |
| ART drug regimen                  | 1c                | 166(31.3)           | 35(6.6)  | 0.8                 |
|                                   | 1d                | 54(10.2)            | 13(2.5)  |                     |
|                                   | 1e                | 197(37.2)           | 36(6.8)  |                     |
|                                   | 1f                | 25(4.7)             | 4(0.8)   |                     |
| Opportunistic infections          | Yes               | 4(0.8)              | 8(1.5)   | <0.001              |
|                                   | No                | 438(82.6)           | 80(15.1) |                     |
| CD4 level                         | Less than 500     | 228(43)             | 61(11.5) | 0.002               |
|                                   | 500 and above     | 214(40.4)           | 27(5.1)  |                     |

184 1c = Zidovudine (AZT) + Lamivudine (3TC) + Nevirapine (NVP); 1d = AZT + 3TC + Efavirenz (EFV); 1e = Tenofovir (TDF) + 3TC+EFV;  
185 1f = TDF+3TC+NVP

### 186 3.4. Prevalence and associated factors of depressive symptoms

187 The overall prevalence of depressive symptoms was 13.3% (11.2 – 15.4%). The prevalence was  
188 significantly higher in people with HIV/AIDS, 16.6% (13.4 – 19.8%) as compared to the  
189 community sample, 9.7% (7.1 – 12.3%),  $p = 0.001$ . Variables significantly associated with  
190 depressive symptoms were older age [AOR = 2.3, 95% CI: 1.1, 5.1], HIV positive sample [AOR  
191 = 1.7, 95% CI: 1.1, 2.6], being single [AOR = 1.9, 95% CI: 1.1, 3.5], divorced/widowed [AOR =  
192 2.3, 95% CI: 1.5, 3.5], poor social support [AOR = 3.9, 95% CI: 1.7, 9.8]. (Table 4)

193

194 Table 4: Factors associated with depressive symptoms (N=1026)

195

| Variables                                    |                      | Depressive symptoms |     | AOR (95% CI)          | p-value |
|----------------------------------------------|----------------------|---------------------|-----|-----------------------|---------|
|                                              |                      | No                  | Yes |                       |         |
| Sample type                                  | Community sample     | 448                 | 48  | 1                     |         |
|                                              | ART clinic sample    | 442                 | 88  | <b>1.7(1.1 – 2.6)</b> | 0.01    |
| Sex                                          | Male                 | 370                 | 46  | 1                     |         |
|                                              | Female               | 520                 | 90  | 0.9(0.6 – 1.5)        | 0.84    |
| Age                                          | Less than 25 years   | 117                 | 14  | 1                     |         |
|                                              | 25 – 44 years        | 609                 | 78  | 1.1(0.5 – 2.1)        | 0.87    |
|                                              | 45 years and above   | 164                 | 44  | <b>2.3(1.1 – 5.1)</b> | 0.03    |
| Khat chewing                                 | Never                | 835                 | 129 | 1                     |         |
|                                              | Yes                  | 55                  | 7   | 0.9(0.4 – 2.1)        | 0.84    |
| Marital status                               | Married              | 467                 | 44  | 1                     |         |
|                                              | Single               | 177                 | 25  | <b>1.9(1.1 – 3.5)</b> | 0.03    |
|                                              | Divorced/widowed     | 246                 | 67  | <b>2.3(1.5 – 3.5)</b> | < 0.001 |
| Problematic alcohol use                      | No                   | 805                 | 123 | 1                     |         |
|                                              | Yes                  | 85                  | 13  | 1.2(0.6 – 2.3)        | 0.59    |
| Social support                               | Poor support         | 393                 | 81  | <b>3.9(1.7 – 9.6)</b> | 0.002   |
|                                              | Intermediate support | 398                 | 49  | 2.4(0.96– 5.7)        | 0.06    |
|                                              | High support         | 99                  | 6   | 1                     |         |
| Perceived quality of life compared to others | Poor                 | 443                 | 90  | 1.4(0.8 – 2.4)        | 0.19    |
|                                              | Not good – not bad   | 13                  | 21  | 1.8(0.9 – 3.3)        | 0.08    |
|                                              | Good                 | 316                 | 25  | 1                     |         |

196

## 4. Discussion

This study reported that the prevalence of moderate to severe depressive symptoms is significantly higher in HIV-positive participants (16.6%) compared to the general population sample (9.7%). This variation was also indicated in the multivariable logistic regression analysis where the odds of depressive symptoms in people with HIV/AIDS was 1.7 times higher than the community sample. The additional burdens in HIV-positive participants including opportunistic infections, ART drug side effects, and lowered level of CD4 count (54.5% of HIV-positive participants have less than 500 CD4) may contribute to this increased prevalence of depressive symptoms in the HIV-positive sample. The finding is in-line with Chinese study (18.33%),<sup>37</sup> higher than Ugandan (8.1%) and USA (12.2%)<sup>38 39</sup> studies, and lower than the Cameroon study (26.7%) and other sub-Saharan countries (26 – 28%).<sup>40-42</sup>

Multiple conditions including HIV-related stigma,<sup>43-45</sup> poor adherence to antiretroviral therapy,<sup>46-48</sup>, and the direct effect of the virus<sup>49</sup> are possible reasons for the excess odds of depressive symptoms in HIV-positive individuals. New perspectives towards non-medical services and resource allocation,<sup>50</sup> and interventions focusing on reduction of risk behavior and social stigma would decrease the prevalence of depressive symptoms in HIV-positive individuals.<sup>51</sup> The advancements in HIV prevention and treatment are becoming promising in ending the HIV epidemic. However, this might be difficult to achieve without addressing depression and other mental health issues in HIV/AIDS care.

Marital status, age, and social support were important factors associated with depressive symptoms in the overall sample of this study. The odds of depressive symptoms in single and divorced/widowed participants was nearly twofold as compared to their married counterparts.

1  
2  
3 219 Marital tragedies are the most stressful events<sup>52</sup> that can lead to a sense of insecurity and  
4  
5 220 hopelessness. The odds of having depressive symptoms at the age of 45 years and above was more  
6  
7  
8 221 than twofold as compared to those with younger age (25 years and below). Poor social support is  
9  
10 222 also strongly and positively associated with depressive symptoms in which participants with poor  
11  
12 223 social support were about 4 times more likely to have depressive symptoms compared to  
13  
14 224 participants with high social support. Social interaction between family members and the family's  
15  
16 225 ability to react positively to life changes are important to reassuring individuals and maintaining  
17  
18 226 social cohesion.<sup>53</sup> On the other hand, if this social connectedness gets loose, the individual might  
19  
20 227 feel lonely and depressed. This finding is supported by the study in Ethiopia and other sub-Saharan  
21  
22 228 countries<sup>41 54</sup>.

23  
24  
25  
26  
27 229 In general, this study provided evidence about depressive symptoms in HIV/AIDS patients by  
28  
29 230 comparing it with the general population. In the current study, gender, perceived quality of life  
30  
31 231 compared to others, and substance use (khat chewing and alcohol, do not involve intravenous  
32  
33 232 administration) were not statistically significant. However, recent finding indicates HIV-positive  
34  
35 233 individuals with drug injection were more likely to have depression<sup>55</sup>.

#### 36 37 38 39 234 4.1. Limitations

40  
41  
42 235 The study has some limitations to take into consideration in interpretations of the result. The first  
43  
44 236 limitation is with matching. It would have been better if we did a matching of important variables  
45  
46 237 for depression such as sex and age in both groups. The other potential limitation is that we did not  
47  
48 238 conduct HIV testing in the general population comparison group to exclude those with positive  
49  
50 239 HIV test results. Though we excluded those who reported their HIV positive status in the  
51  
52 240 comparison group, we were not able to exclude those who are HIV positive but who did not know  
53  
54 241 their status.

## 5. Conclusions

Depressive symptoms are significantly higher in people with HIV/AIDS compared to the general population. The higher prevalence of depressive symptoms in people with HIV/AIDS is an important public health issue that urges the incorporation of mental health care and depression screening in routine HIV/AIDS care.

## Declarations

### **Ethics approval and consent to participate**

Ethical clearance was obtained from the College of Medicine and Health Sciences ethical review committee of Bahir Dar University. Formal permission letter was obtained from the University and local administration. Participants were informed about the purpose of the study, confidentiality, and their rights to withdraw from the interview at any time they want. Informed consent was obtained from each participant. To maintain confidentiality, the questionnaire was anonymous, and the data were kept in a secure place.

### **Availability of data and material**

The data related to this research will be available upon reasonable request.

### **Competing Interests**

The authors declare that they have no competing interests.

### **Funding**

This research was supported by Bahir Dar University via Mecha Demographic Surveillance and Field Research Center, grant number (not applicable).



## 262 Author Contributions

263 All authors (TM, HB, and WF) equally contributed from the conception to the completion of this  
264 project.

## 265 Acknowledgment

266 We are very thankful to the study participants for their volunteer participation and Bahir Dar  
267 University for the financial support.

## 268 Reference

- 269 1. Frank TD, Carter A, Jahagirdar D, et al. Global, regional, and national incidence, prevalence, and  
270 mortality of HIV, 1980–2017, and forecasts to 2030, for 195 countries and territories: a systematic  
271 analysis for the Global Burden of Diseases, Injuries, and Risk Factors Study 2017. *The lancet HIV*  
272 2019;6(12):e831-e59. doi: 10.1016/S2352-3018(19)30196-1
- 273 2. UNAIDS. Global HIV & AIDS statistics — 2020 fact sheet, 2020.
- 274 3. Kang H-J, Kim S-Y, Bae K-Y, et al. Comorbidity of Depression with Physical Disorders: Research and  
275 Clinical Implications. *Chonnam Med J* 2015;51(1):8-18.
- 276 4. World Health Organization. Depression: A Global Crisis. World Mental Health Day, October 10 2012.  
277 *World Federation for Mental Health, Occoquan, Va, USA* 2012
- 278 5. Ciesla JA, Roberts JE. Meta-analysis of the relationship between HIV infection and risk for depressive  
279 disorders. *Am J Psychiatry* 2001;158(5):725-30. doi: 10.1176/appi.ajp.158.5.725
- 280 6. Jin H, Hampton Atkinson J, Yu X, et al. Depression and suicidality in HIV/AIDS in China. *J Affect Disord*  
281 2006;94(1-3):269-75. doi: 10.1016/j.jad.2006.04.013
- 282 7. Rabkin JG. HIV and depression: 2008 review and update. *Curr HIV/AIDS Rep* 2008;5(4):163-71.
- 283 8. Nakasujja N, Skolasky RL, Musisi S, et al. Depression symptoms and cognitive function among individuals  
284 with advanced HIV infection initiating HAART in Uganda. *BMC Psychiatry* 2010;10:44. doi:  
285 10.1186/1471-244x-10-44
- 286 9. Nakimuli-Mpungu E, Bass JK, Alexandre P, et al. Depression, alcohol use and adherence to antiretroviral  
287 therapy in sub-Saharan Africa: a systematic review. *AIDS Behav* 2012;16(8):2101-18. doi:  
288 10.1007/s10461-011-0087-8
- 289 10. Rezaei S, Ahmadi S, Rahmati J, et al. Global prevalence of depression in HIV/AIDS: a systematic review  
290 and meta-analysis. *BMJ Supportive & Palliative Care* 2019;9(4):404. doi:  
291 10.1136/bmjspcare-2019-001952
- 292 11. Eshun-Wilson I, Akena DH, Siegfried N, et al. Antidepressants for depression in adults with HIV  
293 infection. *Cochrane Database of Systematic Reviews*: John Wiley & Sons, Ltd 2014.
- 294 12. Leserman J. Role of depression, stress, and trauma in HIV disease progression. *Psychosom Med*  
295 2008;70(5):539-45. doi: 10.1097/PSY.0b013e3181777a5f
- 296 13. Wagner GJ, Ghosh-Dastidar B, Dickens A, et al. Depression and its Relationship to Work Status and  
297 Income Among HIV Clients in Uganda. *World J AIDS* 2012;2(3):126-34. doi:  
298 10.4236/wja.2012.23018

- 1  
2  
3 299 14. Amberbir A, Woldemichael K, Getachew S, et al. Predictors of adherence to antiretroviral therapy  
4 300 among HIV-infected persons: a prospective study in Southwest Ethiopia. *BMC Public Health*  
5 301 2008;8:265. doi: 10.1186/1471-2458-8-265  
6 302  
7 302 15. Bhatia MS, Munjal S. Prevalence of Depression in People Living with HIV/AIDS Undergoing ART and  
8 303 Factors Associated with it. *J Clin Diagn Res* 2014;8(10):WC01-04. doi:  
9 304 10.7860/jcdr/2014/7725.4927  
10 305  
11 306 16. Hailemariam S, Tessema F, Asefa M, et al. The prevalence of depression and associated factors in  
12 307 Ethiopia: findings from the National Health Survey. *Int J Ment Health Syst* 2012;6(1):23. doi:  
13 308 10.1186/1752-4458-6-23  
14 309  
15 310 17. Kamen C, Arganbright J, Kienitz E, et al. HIV-related stigma: implications for symptoms of anxiety and  
16 311 depression among Malawian women. *Afr J AIDS Res* 2015;14(1):67-73. doi:  
17 312 10.2989/16085906.2015.1016987  
18 313  
19 314 18. Oladeji BD, Taiwo B, Mosuro O, et al. Suicidal Behavior and Associations with Quality of Life among  
20 315 HIV/AIDS-Infected Patients in Ibadan, Nigeria. *J Int Assoc Provid AIDS Care* 2015 doi:  
21 316 10.1177/2325957415617829  
22 317  
23 318 19. Tran BX, Dang AK, Truong NT, et al. Depression and Quality of Life among Patients Living with HIV/AIDS  
24 319 in the Era of Universal Treatment Access in Vietnam. *Int J Environ Res Public Health*  
25 320 2018;15(12):2888. doi: 10.3390/ijerph15122888  
26 321  
27 322 20. Chibanda D, Cowan F, Gibson L, et al. Prevalence and correlates of probable common mental disorders  
28 323 in a population with high prevalence of HIV in Zimbabwe. *BMC Psychiatry* 2016;16(1):55. doi:  
29 324 10.1186/s12888-016-0764-2  
30 325  
31 326 21. Asch SM, Kilbourne AM, Gifford AL, et al. Underdiagnosis of depression in HIV: who are we missing? *J*  
32 327 *Gen Intern Med* 2003;18(6):450-60. doi: 10.1046/j.1525-1497.2003.20938.x [published Online  
33 328 First: 2003/06/26]  
34 329  
35 330 22. Andersen L, Kagee A, O'Cleirigh C, et al. Understanding the experience and manifestation of depression  
36 331 in people living with HIV/AIDS in South Africa. *AIDS Care* 2015;27(1):59-62. doi:  
37 332 10.1080/09540121.2014.951306  
38 333  
39 334 23. Collins PY, Holman AR, Freeman MC, et al. What is the relevance of mental health to HIV/AIDS care  
40 335 and treatment programs in developing countries? A systematic review. *AIDS* 2006;20(12):1571-  
41 336 82. doi: 10.1097/01.aids.0000238402.70379.d4  
42 337  
43 338 24. Odokonyero R, Wagner G, Ngo V, et al. Giving "Sadness" a Name: The Need for Integrating Depression  
44 339 Treatment into HIV Care in Uganda. *J Int Assoc Provid AIDS Care* 2015;14(2):108-11. doi:  
45 340 10.1177/2325957414557265  
46 341  
47 342 25. Beyene Gebrezgiabher B, Huluf Abraha T, Hailu E, et al. Depression among Adult HIV/AIDS Patients  
48 343 Attending ART Clinics at Aksum Town, Aksum, Ethiopia: A Cross-Sectional Study. *Depression*  
49 344 *research and treatment* 2019;2019:3250431. doi: 10.1155/2019/3250431 [published Online First:  
50 2019/03/14]  
51 345  
52 346 26. Abadiga M. Depression and its associated factors among HIV/AIDS patients attending ART clinics at  
53 347 Gimbi General hospital, West Ethiopia, 2018. *BMC research notes* 2019;12(1):527. doi:  
54 348 10.1186/s13104-019-4553-0 [published Online First: 2019/08/21]  
55 349  
56 350 27. Duko B, Geja E, Zewude M, et al. Prevalence and associated factors of depression among patients with  
57 351 HIV/AIDS in Hawassa, Ethiopia, cross-sectional study. *Annals of general psychiatry* 2018;17:45.  
58 352 doi: 10.1186/s12991-018-0215-1 [published Online First: 2018/11/06]  
59 353  
60 354 28. Mekuria LA, Sprangers MA, Prins JM, et al. Health-related quality of life of HIV-infected adults receiving  
61 355 combination antiretroviral therapy in Addis Ababa. *AIDS Care* 2015;27(8):934-45. doi:  
62 356 10.1080/09540121.2015.1020748 [published Online First: 2015/03/19]

- 1  
2  
3 345 29. Gelaye B, Williams MA, Lemma S, et al. Validity of the Patient Health Questionnaire-9 for depression  
4 346 screening and diagnosis in East Africa. *Psychiatry Res* 2013;210(2):653-61. doi:  
5 347 10.1016/j.psychres.2013.07.015  
6  
7 348 30. Kroenke K, Spitzer RL, Williams JBW. The PHQ-9. *J Gen Intern Med* 2001;16(9):606-13. doi:  
8 349 10.1046/j.1525-1497.2001.016009606.x  
9 350 31. Abiola T, Udofia O, Zakari M, et al. Psychometric properties of the 3-item Oslo Social Support scale  
10 351 among clinical students of Bayero University Kano, Nigeria. *Malaysian Journal of Psychiatry*  
11 352 2013;22(2):32-41.  
12 353 32. Murphy B, Herrman H, Hawthorne G, et al. Australian WHOQoL instruments: User's manual and  
13 354 interpretation guide. *Melbourne, Australia: Australian WHOQOL Field Study Centre* 2000  
14 355 33. Fekadu A, Medhin G, Selamu M, et al. Population level mental distress in rural Ethiopia. *BMC Psychiatry*  
15 356 2014;14(1):194. doi: 10.1186/1471-244X-14-194  
16 357 34. Bradley KA, Bush KR, Epler AJ, et al. Two brief alcohol-screening tests From the Alcohol Use Disorders  
17 358 Identification Test (AUDIT): validation in a female Veterans Affairs patient population. *Arch Intern*  
18 359 *Med* 2003;163(7):821-29. doi: 10.1001/archinte.163.7.821  
19 360 35. Bush K, Kivlahan DR, McDonell MB, et al. The AUDIT alcohol consumption questions (AUDIT-C): an  
20 361 effective brief screening test for problem drinking. Ambulatory Care Quality Improvement Project  
21 362 (ACQUIP). Alcohol Use Disorders Identification Test. *Arch Intern Med* 1998;158(16):1789-95.  
22 363 36. Sperandei S. Understanding logistic regression analysis. *Biochem Med (Zagreb)* 2014;24(1):12-18. doi:  
23 364 10.11613/BM.2014.003  
24 365 37. Jiang Y, Wang M, Wei XQ, et al. [Prevalence of depression and related factors in 180 HIV/AIDS patients  
25 366 receiving highly active antiretroviral therapy]. *Zhonghua Liu Xing Bing Xue Za Zhi* 2016;37(5):638-  
26 367 42.  
27 368 38. Kinyanda E, Hoskins S, Nakku J, et al. Prevalence and risk factors of major depressive disorder in  
28 369 HIV/AIDS as seen in semi-urban Entebbe district, Uganda. *BMC Psychiatry* 2011;11:205. doi:  
29 370 10.1186/1471-244X-11-205  
30 371 39. Skalski LM, Watt MH, MacFarlane JC, et al. Mental Health and Substance Use Among Patients in a  
31 372 North Carolina HIV Clinic. *N C Med J* 2015;76(3):148-55. doi: 10.18043/nmc.76.3.148  
32 373 40. Ngum PA, Fon PN, Ngu RC, et al. Depression Among HIV/AIDS Patients on Highly Active Antiretroviral  
33 374 Therapy in the Southwest Regional Hospitals of Cameroon: A Cross-Sectional Study. *Neurol Ther*  
34 375 2017;6(1):103-14. doi: 10.1007/s40120-017-0065-9  
35 376 41. Seth P, Kidder D, Pals S, et al. Psychosocial functioning and depressive symptoms among HIV-positive  
36 377 persons receiving care and treatment in Kenya, Namibia, and Tanzania. *Prev Sci* 2014;15(3):318-  
37 378 28. doi: 10.1007/s11121-013-0420-8  
38 379 42. Olley BO, Seedat S, Stein DJ. Persistence of psychiatric disorders in a cohort of HIV/AIDS patients in  
39 380 South Africa: a 6-month follow-up study. *J Psychosom Res* 2006;61(4):479-84. doi:  
40 381 10.1016/j.jpsychores.2006.03.010  
41 382 43. Endeshaw M, Walson J, Rawlins S, et al. Stigma in Ethiopia: association with depressive symptoms in  
42 383 people with HIV. *AIDS Care* 2014;26(8):935-39. doi: 10.1080/09540121.2013.869537  
43 384 44. Nachega JB, Morroni C, Zuniga JM, et al. HIV-related stigma, isolation, discrimination, and serostatus  
44 385 disclosure: a global survey of 2035 HIV-infected adults. *J Int Assoc Physicians AIDS Care (Chic)*  
45 386 2012;11(3):172-78. doi: 10.1177/1545109712436723  
46 387 45. Onyebuchi-Iwudibia O, Brown A. HIV and depression in Eastern Nigeria: the role of HIV-related stigma.  
47 388 *AIDS Care* 2014;26(5):653-57. doi: 10.1080/09540121.2013.844761  
48 389 46. Malow R, Dévieux JG, Stein JA, et al. Depression, substance abuse and other contextual predictors of  
49 390 adherence to antiretroviral therapy (ART) among Haitians. *AIDS Behav* 2013;17(4):1221-30. doi:  
50 391 10.1007/s10461-012-0400-1  
51  
52  
53  
54  
55  
56  
57  
58  
59  
60

- 1  
2  
3 392 47. Sin NL, DiMatteo MR. Depression treatment enhances adherence to antiretroviral therapy: a meta-  
4 393 analysis. *Ann Behav Med* 2014;47(3):259-69. doi: 10.1007/s12160-013-9559-6  
5 394 48. Wroe EB, Hedt-Gauthier BL, Franke MF, et al. Depression and patterns of self-reported adherence to  
6 395 antiretroviral therapy in Rwanda. *Int J STD AIDS* 2015;26(4):257-61. doi:  
7 396 10.1177/0956462414535206  
8 397 49. Del Guerra FB, Fonseca JLI, Figueiredo VM, et al. Human immunodeficiency virus-associated  
9 398 depression: contributions of immuno-inflammatory, monoaminergic, neurodegenerative, and  
10 399 neurotrophic pathways. *J Neurovirol* 2013;19(4):314-27. doi: 10.1007/s13365-013-0177-7  
11 400 50. Tran BX, Do HP, Hall B, et al. The Use of Health Behavioral Theories in HIV/AIDS Research: A  
12 401 Bibliometric Analysis (Gap Research). *AIDS reviews* 2019;21(2):93-107. doi:  
13 402 10.24875/AIDSRev.19000062 [published Online First: 2019/07/25]  
14 403 51. Tran BX, Ho RCM, Ho CSH, et al. Depression among Patients with HIV/AIDS: Research Development  
15 404 and Effective Interventions (GAPRESEARCH). *Int J Environ Res Public Health* 2019;16(10) doi:  
16 405 10.3390/ijerph16101772 [published Online First: 2019/05/22]  
17 406 52. Holmes TH, Rahe RH. The social readjustment rating scale. *J Psychosom Res* 1967;11(2):213-18. doi:  
18 407 [https://doi.org/10.1016/0022-3999\(67\)90010-4](https://doi.org/10.1016/0022-3999(67)90010-4)  
19 408 53. Wouters E, Masquillier C, le Roux Booyesen F. The Importance of the Family: A Longitudinal Study of  
20 409 the Predictors of Depression in HIV Patients in South Africa. *AIDS Behav* 2016 doi:  
21 410 10.1007/s10461-016-1294-0  
22 411 54. Tesfaw G, Ayano G, Awoke T, et al. Prevalence and correlates of depression and anxiety among  
23 412 patients with HIV on-follow up at Alert Hospital, Addis Ababa, Ethiopia. *BMC Psychiatry*  
24 413 2016;16(1):368. doi: 10.1186/s12888-016-1037-9  
25 414 55. Than PQT, Tran BX, Nguyen CT, et al. Stigma against patients with HIV/AIDS in the rapid expansion of  
26 415 antiretroviral treatment in large drug injection-driven HIV epidemics of Vietnam. *Harm Reduction*  
27 416 *Journal* 2019;16(1):6. doi: 10.1186/s12954-019-0277-7

417

**Depression among people with HIV/AIDS in Northwest Ethiopia: A comparative cross-sectional study**

Tesfa Mekonen<sup>1,\*</sup>, Habte Belete<sup>1</sup>, Wubalem Fekadu<sup>1,2</sup>

<sup>1</sup>Department of Psychiatry, College of Medicine and Health Sciences, Bahir Dar University, Bahir Dar, Ethiopia

<sup>2</sup>Department of Psychiatry, College of Health Sciences, Addis Ababa University, Addis Ababa, Ethiopia

**STROBE 2007 (v4) Statement—Checklist of items that should be included in reports of *cross-sectional studies***

| Section/Topic                | Item # | Recommendation                                                                                                                                                                       | Reported on page # |
|------------------------------|--------|--------------------------------------------------------------------------------------------------------------------------------------------------------------------------------------|--------------------|
| Title and abstract           | 1      | (a) Indicate the study’s design with a commonly used term in the title or the abstract                                                                                               | 1                  |
|                              |        | (b) Provide in the abstract an informative and balanced summary of what was done and what was found                                                                                  | 2                  |
| <b>Introduction</b>          |        |                                                                                                                                                                                      |                    |
| Background/rationale         | 2      | Explain the scientific background and rationale for the investigation being reported                                                                                                 | 3 & 4              |
| Objectives                   | 3      | State specific objectives, including any prespecified hypotheses                                                                                                                     | 4                  |
| <b>Methods</b>               |        |                                                                                                                                                                                      |                    |
| Study design                 | 4      | Present key elements of study design early in the paper                                                                                                                              | 5                  |
| Setting                      | 5      | Describe the setting, locations, and relevant dates, including periods of recruitment, exposure, follow-up, and data collection                                                      | 5                  |
| Participants                 | 6      | (a) Give the eligibility criteria, and the sources and methods of selection of participants                                                                                          | 5                  |
| Variables                    | 7      | Clearly define all outcomes, exposures, predictors, potential confounders, and effect modifiers. Give diagnostic criteria, if applicable                                             | 6                  |
| Data sources/<br>measurement | 8      | For each variable of interest, give sources of data and details of methods of assessment (measurement). Describe comparability of assessment methods if there is more than one group | 6 & 7              |
| Bias                         | 9      | Describe any efforts to address potential sources of bias                                                                                                                            | 5, 6 & 7           |
| Study size                   | 10     | Explain how the study size was arrived at                                                                                                                                            | 5 & 6              |
| Quantitative variables       | 11     | Explain how quantitative variables were handled in the analyses. If applicable, describe which groupings were chosen and why                                                         | 5 – 7              |
| Statistical methods          | 12     | (a) Describe all statistical methods, including those used to control for confounding                                                                                                | 7                  |

|                          |     |                                                                                                                                                                                                              |           |
|--------------------------|-----|--------------------------------------------------------------------------------------------------------------------------------------------------------------------------------------------------------------|-----------|
|                          |     | (b) Describe any methods used to examine subgroups and interactions                                                                                                                                          | N/A       |
|                          |     | (c) Explain how missing data were addressed                                                                                                                                                                  | N/A       |
|                          |     | (d) If applicable, describe analytical methods taking account of sampling strategy                                                                                                                           | N/A       |
|                          |     | (e) Describe any sensitivity analyses                                                                                                                                                                        | N/A       |
| <b>Results</b>           |     |                                                                                                                                                                                                              |           |
| Participants             | 13  | (a) Report numbers of individuals at each stage of study—eg numbers potentially eligible, examined for eligibility, confirmed eligible, included in the study, completing follow-up, and analysed            | 5         |
|                          |     | (b) Give reasons for non-participation at each stage                                                                                                                                                         | 7         |
|                          |     | (c) Consider use of a flow diagram                                                                                                                                                                           | N/A       |
| Descriptive data         | 14* | (a) Give characteristics of study participants (eg demographic, clinical, social) and information on exposures and potential confounders                                                                     | 8 – 10    |
|                          |     | (b) Indicate number of participants with missing data for each variable of interest                                                                                                                          | N/A       |
| Outcome data             | 15  | Report numbers of outcome events or summary measures                                                                                                                                                         | 12        |
| Main results             | 16  | (a) Give unadjusted estimates and, if applicable, confounder-adjusted estimates and their precision (eg, 95% confidence interval). Make clear which confounders were adjusted for and why they were included | 12        |
|                          |     | (b) Report category boundaries when continuous variables were categorized                                                                                                                                    | 8, 10, 12 |
|                          |     | (c) If relevant, consider translating estimates of relative risk into absolute risk for a meaningful time period                                                                                             | N/A       |
| Other analyses           | 17  | Report other analyses done—eg analyses of subgroups and interactions, and sensitivity analyses                                                                                                               | N/A       |
| <b>Discussion</b>        |     |                                                                                                                                                                                                              |           |
| Key results              | 18  | Summarise key results with reference to study objectives                                                                                                                                                     | 13        |
| Limitations              | 19  | Discuss limitations of the study, taking into account sources of potential bias or imprecision. Discuss both direction and magnitude of any potential bias                                                   | 14        |
| Interpretation           | 20  | Give a cautious overall interpretation of results considering objectives, limitations, multiplicity of analyses, results from similar studies, and other relevant evidence                                   | 12 – 15   |
| Generalisability         | 21  | Discuss the generalisability (external validity) of the study results                                                                                                                                        | 12 – 15   |
| <b>Other information</b> |     |                                                                                                                                                                                                              |           |
| Funding                  | 22  | Give the source of funding and the role of the funders for the present study and, if applicable, for the original study on which the present article is based                                                | 15        |
